# Supplementary material for: Clinker: visualizing fusion genes detected in RNA-seq data
Source: PubMed Central journal article supplement (PMC6065480; doi:10.1093/gigascience/giy079), 2018-07-04
Supplement: giy079_response_to_reviewer_comments_revision_1.pdf [file giy079_response_to_reviewer_comments_revision_1.pdf]

## Author's Response To Reviewer Comments

Close

We have now made the formatting changes requested

Close
